# Supplementary material
Source: PubMed Central journal article supplement (PMC4571692)
Supplement: rspb20151003supp1.pdf [file rspb20151003supp1.pdf]

1 **Supplementary Material for “Biotic replacement and mass extinction of the**  
2 **Ediacara biota”**

3 **Darroch et al. (submitted)**

4  
5 **S1** - Scatterplot illustrating positive correlation (spearman rho) between ‘worker effort’  
6 (quantified as the number of original taxonomic papers), and overall generic richness for  
7 Ediacaran fossil localities. Note that we include skeletal fossils (e.g., *Namacalathus* and  
8 *Cloudina*), likely form taxa (e.g., *Aspidella*), and enigmatic tubular taxa (e.g.,  
9 *Shaanxilithes*) in counts.

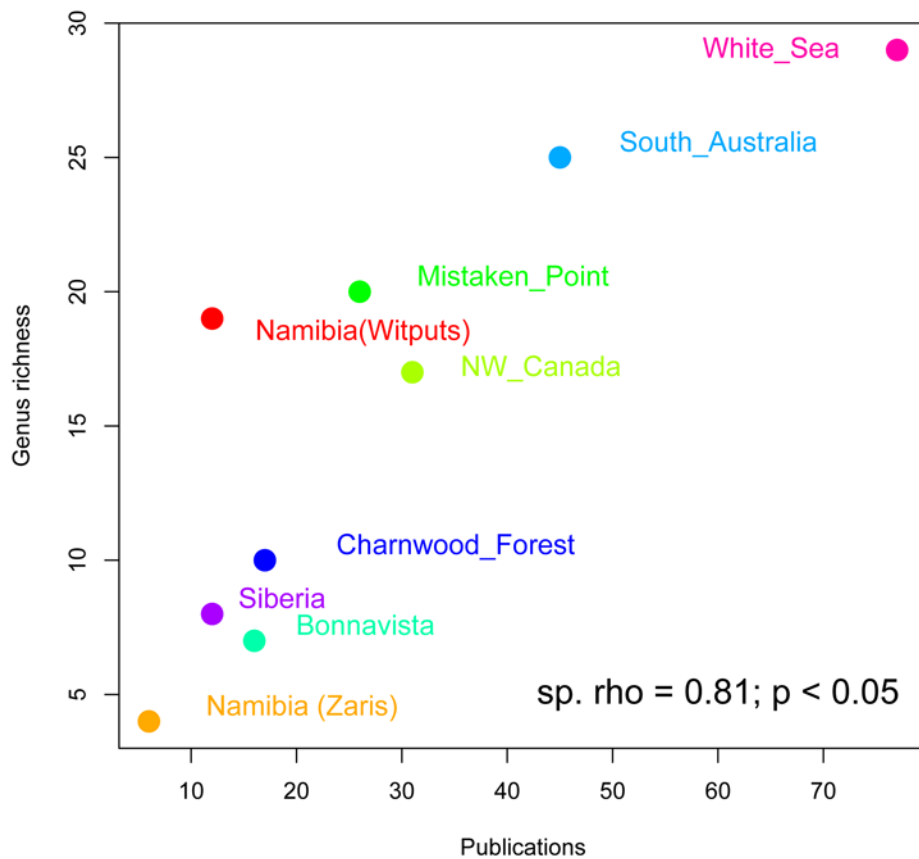

10  
11  
12  
13  
14  
15  
16

17 **S2** – Measured sections (see also Fig. 1), showing the stratigraphic distribution of  
18 Ediacaran fossils encountered during measurement. Strata exposed as three prominent  
19 ridges or breaks in slope, which are interspersed with scree material, can be traced around  
20 the top of the koppe. The first ridge is equivalent to fossil bed ‘A’ of Narbonne et al.  
21 (1997) while the second ridge (located stratigraphically ~ 2 m above Bed 1) is equivalent  
22 to fossil bed ‘B’ (of Narbonne et al. 1997) The third ridge is located ~8.5 m above ridge 2,  
23 and to our knowledge has not previously been identified as a fossiliferous horizon. *In situ*  
24 Ediacaran macrofossils were recovered from five individual horizons within the  
25 siliciclastic deposits (including the three ridges). From our section 1 in particular, we  
26 recovered *in-situ* fossils from ~1 m above the base of the siliciclastic horizons (thin-  
27 bedded green siltstone), the top surface of ridge 1 (weakly rippled coarse sandstone with  
28 abundant microbial mat texture), ~50 cm above ridge 1 (thin-bedded green siltstone), the  
29 top surface of ridge 2 (rippled medium sandstone), and within ridge 3 (thin yellow-green  
30 medium sandstone horizons with minor carbonate). Fossils recovered from float material  
31 occurred in a number of different lithologies, suggesting the existence of numerous other  
32 fossiliferous horizons not identified in this survey. Microbial mat textures are developed  
33 throughout the section, but particularly well on the top surface of ridge 1 where a large  
34 proportion of *in-situ* fossils are recorded. Similar to previous studies, we find a dramatic  
35 change in bedding, from horizontal to sub-horizontal/sub-vertical at the contact between  
36 fossil-bearing siliciclastic horizons and underlying carbonate, interpreted by Narbonne et  
37 al. (1997) as a ‘mega slump’. Due to the discovery of Ediacaran macrofossils preserved  
38 *in-situ* on bedding planes (i.e., not jumbled and/or preserved in 3 dimensions, similar to  
39 transported assemblages elsewhere in Namibia – see e.g., Vickers-Rich et al., 2013)  
40 immediately above the basal contact, we agree with these previous workers that  
41 deformation was likely not syn-depositional, but rather the result of faulting or relatively  
42 recent slumping. Consequently, fossils are most likely autochthonous (or  
43 paraautochthonous) rather than transported as part of mass-flow facies.  
44

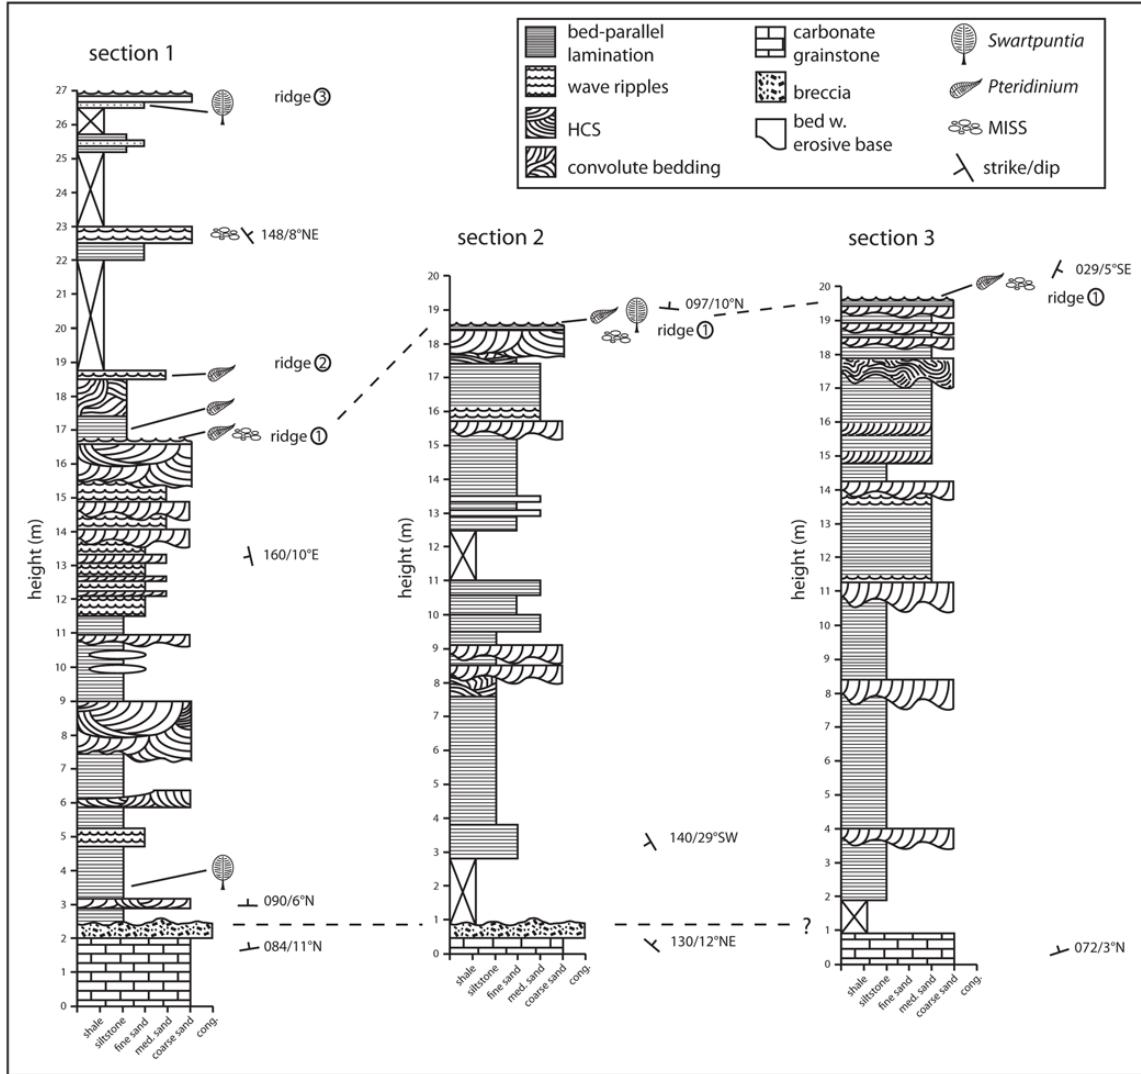

- 45
- 46
- 47
- 48
- 49
- 50
- 51
- 52
- 53
- 54

55 S3 – Google Earth image of the koppe at Farm Swartpunt (top), and showing the  
56 approximate outline of surveyed area shaded in white (bottom).

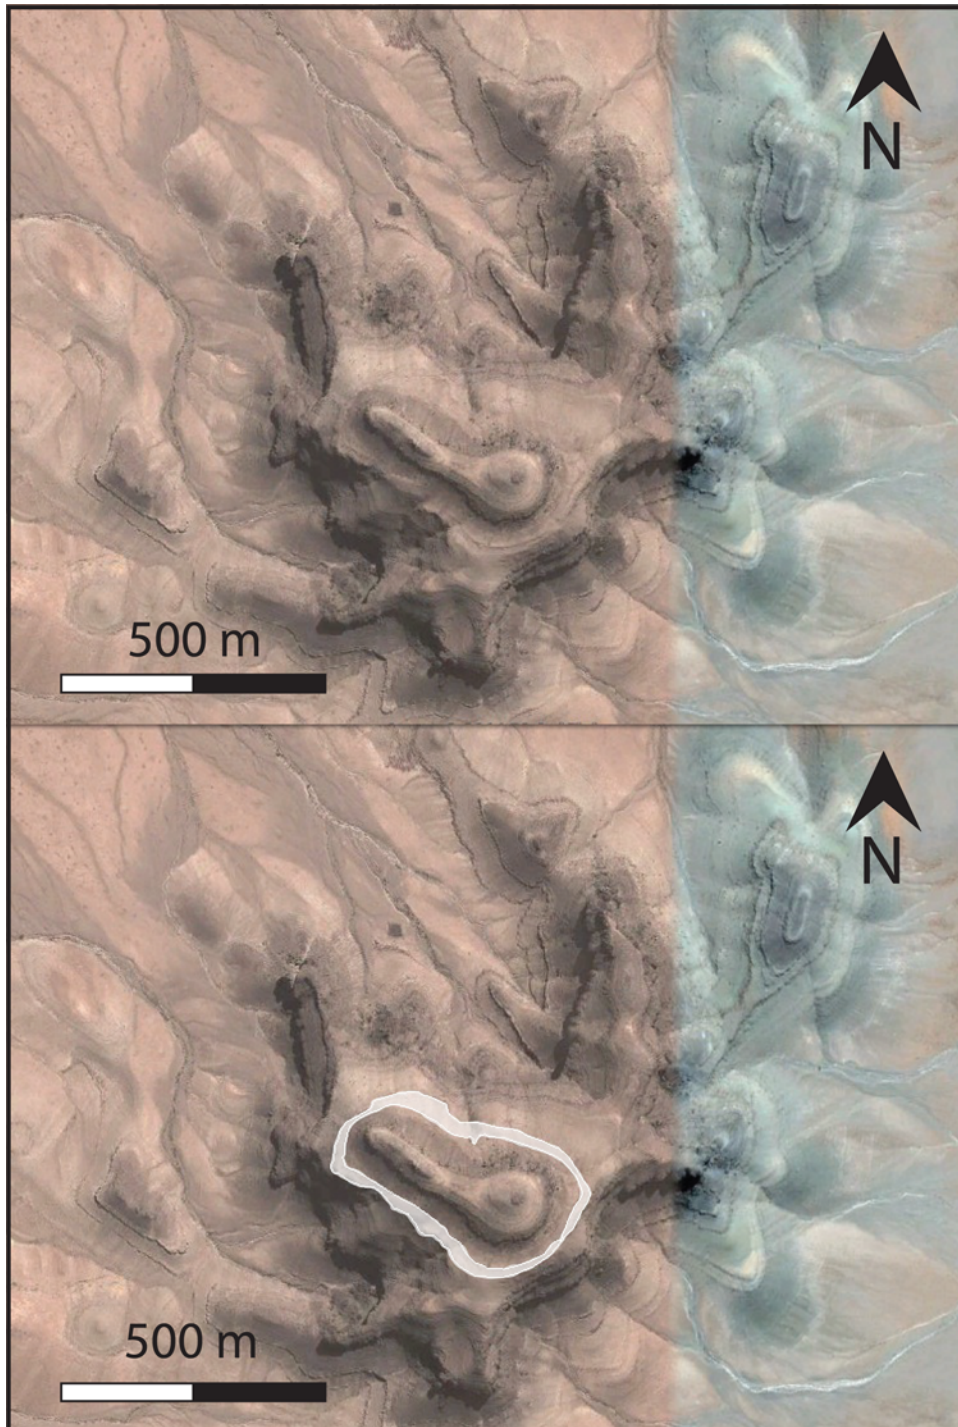

57  
58  
59  
60

61 **S4** – Fossil database and description of sampling methods. Our database was built  
62 through intensive survey of the fossiliferous horizons at Farm Swartpunt, over three days  
63 in June 2014 (4 dedicated spotters, working 5 hours per day; equivalent to ~60 hours  
64 total). The identities and contexts of all identifiable fossils are listed in Supplementary  
65 Table 1. The total surveyed area at Farm Swartpunt, within the relevant horizons is  
66 estimated at 20358.68 meters<sup>2</sup> (= 0.02 km<sup>2</sup>) (based on calculations using the polygon tool  
67 in Google Earth) – see S3.

| Specimen | ID          | Context                                       | Notes                                                                                                                    |
|----------|-------------|-----------------------------------------------|--------------------------------------------------------------------------------------------------------------------------|
| SWP-1    | Aspidella   | float; laminated siltstone/mudstone facies    | bulbous, at base of koppe; Multiple holdfasts                                                                            |
| SWP-2    | Aspidella   | float; laminated siltstone/mudstone facies    | bulbous, at base of koppe; holdfasts                                                                                     |
| SWP-7    | Swartpuntia | float, fine SST with ripple cross laminations | NA                                                                                                                       |
| SWP-15   | Ernietta?   | float, fine SST                               | Scallop-shaped form; prob. Ernietta                                                                                      |
| SWP-37   | Swartpuntia | float, med SST                                | complex stem/vane structure                                                                                              |
| SWP-38   | Swartpuntia | float, med-coarse SST                         | 3D preservation from above main surface                                                                                  |
| SWP-40   | Pteridinium | float, med-coarse SST                         | very small & fractured                                                                                                   |
| SWP-41   | Pteridinium | float                                         | 1 long PT, likely fell from cliff                                                                                        |
| SWP-43   | Aspidella   | float? (but cemented in place); SST           | very big 1st concentric rings w/ faint radial traces extending ~5 cm from center                                         |
| SWP-44   | Swartpuntia | float, coarse cross-bedded sandstone          | preserved flat on curved bedding surface w. petaloids visible; incomplete specimen (edges obscured); zigzag raised stalk |
| SWP-45   | Aspidella   | float                                         | NA                                                                                                                       |
| SWP-46   | Pteridinium | in place (top of bed 1 - coarse sandstone)    | very faint & poorly preserved; only see central ridge + one petaloid (edge not fully resolved)                           |
| SWP-47   | Pteridinium | float, coarse sandstone                       | incomplete but w/ 3D preservation (w-in bed) can see 1 vane clearly w/ mid-ridge and faint 2nd vane                      |
| SWP-48   | Pteridinium | bed top 1 in place                            | 2 vanes; primary visible, 3rd vane? 2D (bed top); largest vane incomplete, min width recorded                            |
| SWP-49   | Pteridinium | in place - bed top 1                          | poss. PT w/ 3D preservation poorly preserved                                                                             |

|        |             |                                         |                                                                                                   |
|--------|-------------|-----------------------------------------|---------------------------------------------------------------------------------------------------|
| SWP-50 | Pteridinium | in place - bed top 1                    | small incomplete PT - only 1 vane visible - preserved 2D                                          |
| SWP-51 | Pteridinium | in place - bed top 1 (coarse sandstone) | small PT - incomplete 2 vis. vanes, preserved in 2D                                               |
| SWP-52 | Pteridinium | float (coarse SST)                      | small PT - 2 vanes & central axis, possible 3D preservation, 1 vane along axis upwards            |
| SWP-53 | Pteridinium | float - bed top 1 - coarse SST          | 2 visible vanes with central axis                                                                 |
| SWP-54 | Pteridinium | in place - bed top 1                    | incomplete sp - 1 vane complete; 2 vanes + central axis visible; 2D preservation                  |
| SWP-55 | Pteridinium | float bed top 1                         | poorly preserved, in rippled trough, 2-3 vanes visible, branches on 2nd vane oriented differently |
| SWP-56 | Bradgatia?  | in place - bed top 1                    | Faint (but visible) rangeomorph elements extending from several vanes; Bradgatia?                 |
| SWP-57 | Pteridinium | in place - bed top 1                    | possible 3D preservation, very poor, all vanes incomplete                                         |
| SWP-59 | Aspidella   | in place - bed top 1                    | 7 individuals; 2D preservation                                                                    |
| SWP-60 | Pteridinium | in place - bed top 1                    | 2 vanes visible, both incomplete w/ central ridge                                                 |
| SWP-61 | Pteridinium | in float - top of bed 1                 | large PT, 2 vanes w/ distinct center ridge, 1 vane complete                                       |
| SWP-62 | Pteridinium | float (coarse SST)                      | 2 vanes incomplete, 3rd vane actually visible!                                                    |
| SWP-63 | Pteridinium | float (med-coarse SST)                  | 2 vanes both incomplete visible                                                                   |
| SWP-64 | Swartpuntia | float                                   | 1 vane complete, 2nd pet has no visible structure                                                 |
| SWP-65 | Pteridinium | in place                                | twisted - good center ridge, all ?? Incomplete                                                    |
| SWP-66 | Pteridinium | float                                   | 2D preservation, L/W incomplete                                                                   |
| SWP-67 | Pteridinium | float                                   | incomplete - 1 vanes visible, 2D preservation                                                     |
| SWP-68 | Pteridinium | in place - top of bed 1                 | incomplete - 2 vanes                                                                              |
| SWP-69 | Pteridinium | float - thick, dark red SST             | 1 petaloid only w/ no central ridge; 2D preservation                                              |
| SWP-70 | Pteridinium | coarse grained in place top of bed 1    | all incomplete - mid petaloid visible, 2D preservation                                            |
| SWP-71 | Pteridinium | in place top of bed 1                   | incomplete- 2 petaloids                                                                           |
| SWP-72 | Pteridinium | float                                   | 2 spec. on slab, both incomplete                                                                  |
| SWP-73 | Pteridinium | float (coarse SST)                      | 2nd sp. on slab incomplete                                                                        |
| SWP-74 | Pteridinium | in place - top of bed 1                 | 2D preservation, 2 vanes, poorly                                                                  |

|        |             |                                                                           |                                                                   |
|--------|-------------|---------------------------------------------------------------------------|-------------------------------------------------------------------|
|        |             |                                                                           | preserved, all measurements incomplete                            |
| SWP-75 | Pteridinium | in place - top of bed 1                                                   | very poorly preserved, 2D preservation, 2 vanes visible           |
| SWP-76 | Pteridinium | in place? See notes, top bed 1                                            | may have been some block rotation...??                            |
| SWP-77 | Aspidella   | in place, top bed 1                                                       | raised central area & raised outer rim                            |
| SWP-78 | Pteridinium | in place, top bed 1 (1 m higher)                                          | incomplete - 2 vanes visible                                      |
| SWP-79 | Pteridinium | in place near top bed 1 in "wavy" SST roller                              | 2D preservation 2 vanes visible & central axis                    |
| SWP-80 | Pteridinium | in place - top of bed 1 - much thinner here - not big cliff forming unit? | incomplete - 2D preservation, 3 Vanes & midline                   |
| SWP-81 | Pteridinium | in place                                                                  | incomplete - poor preservation                                    |
| SWP-82 | Pteridinium | in place                                                                  | same bed as large ?? 1 pet poor complete pic of ??? Taken         |
| SWP-83 | Pteridinium | in place, top of bed 1 - above ? lithology                                | 2 in same place, elements curve in different directions           |
| SWP-84 | Pteridinium | in place, top of bed 1 - above ? lithology                                | 2nd specimen (84) both with 3 vanes                               |
| SWP-85 | Pteridinium | in place                                                                  | this individual bent - two orientations taken; incomplete         |
| SWP-86 | Pteridinium | in place - top of bed 1                                                   | nice one - 1 PW complete, 2 PW visible                            |
| SWP-87 | Pteridinium | in place                                                                  | PW's look complete                                                |
| SWP-88 | Pteridinium | in place                                                                  | Very highly twisted, measurements incomplete, poor preservation   |
| SWP-89 | Pteridinium | in place                                                                  | measured separate but next 3 sp all in same spot, 3D preservation |
| SWP-90 | Pteridinium | in place                                                                  | 2 vanes visible - central axis v. visible                         |
| SWP-91 | Pteridinium | in place                                                                  | none                                                              |
| SWP-92 | Pteridinium | in place                                                                  | small + poorly preserved                                          |
| SWP-93 | Pteridinium | in place                                                                  | sp broken down middle front piece may be lost                     |
| SWP-94 | Pteridinium | in place                                                                  | 1 vane nearly complete, the other weathered off                   |
| SWP-95 | Pteridinium | in place                                                                  | 2 vanes, 1 w/ complete width                                      |
| SWP-96 | Pteridinium | in place                                                                  | poor preservation                                                 |
| SWP-97 | Swartpuntia | in place                                                                  | 1 common PW                                                       |
| SWP-98 | Pteridinium | float - top of bed 1                                                      | big specimen on fallen block -                                    |

|          |             |       |                                                            |
|----------|-------------|-------|------------------------------------------------------------|
|          |             |       | scree slope below classic locality;<br>1 complete petaloid |
| SWP-99   | Aspidella   | float | taken from fine siltstone horizon,<br>4 holdfasts          |
| SWP-100  | Swartpuntia | float | Found in float and end of day 2                            |
| SWP-101  | Swartpuntia | float | Found in float and end of day 2                            |
| SWP-101b | Pteridinium | float | Found in float and end of day 2                            |
| SWP-102  | Pteridinium | float | Found in float and end of day 2                            |
| SWP-103  | Pteridinium | float | Found in float and end of day 2                            |
| SWP-104  | Pteridinium | float | Found in float and end of day 2                            |

68  
69  
70  
71  
72  
73  
74  
75  
76  
77  
78  
79  
80  
81  
82  
83  
84  
85  
86  
87  
88  
89  
90  
91  
92  
93  
94  
95  
96  
97  
98  
99  
100



101 S5 – Representative Ediacara biota recovered from Farm Swartpunt: a-c) *Pteridinium*  
102 *simplex*; d-f) *Swartpuntia germsi*; g) *Nasepia* sp.; h-i) *Aspidella*-type holdfasts, possibly  
103 belonging to *Swartpuntia* (see S5b); j) unidentified rangeomorph taxon, provisionally  
104 assigned to *Bradgatia*; k) unidentified Ernieptomorph taxon, provisionally assigned to  
105 *Ernietta*.  
106

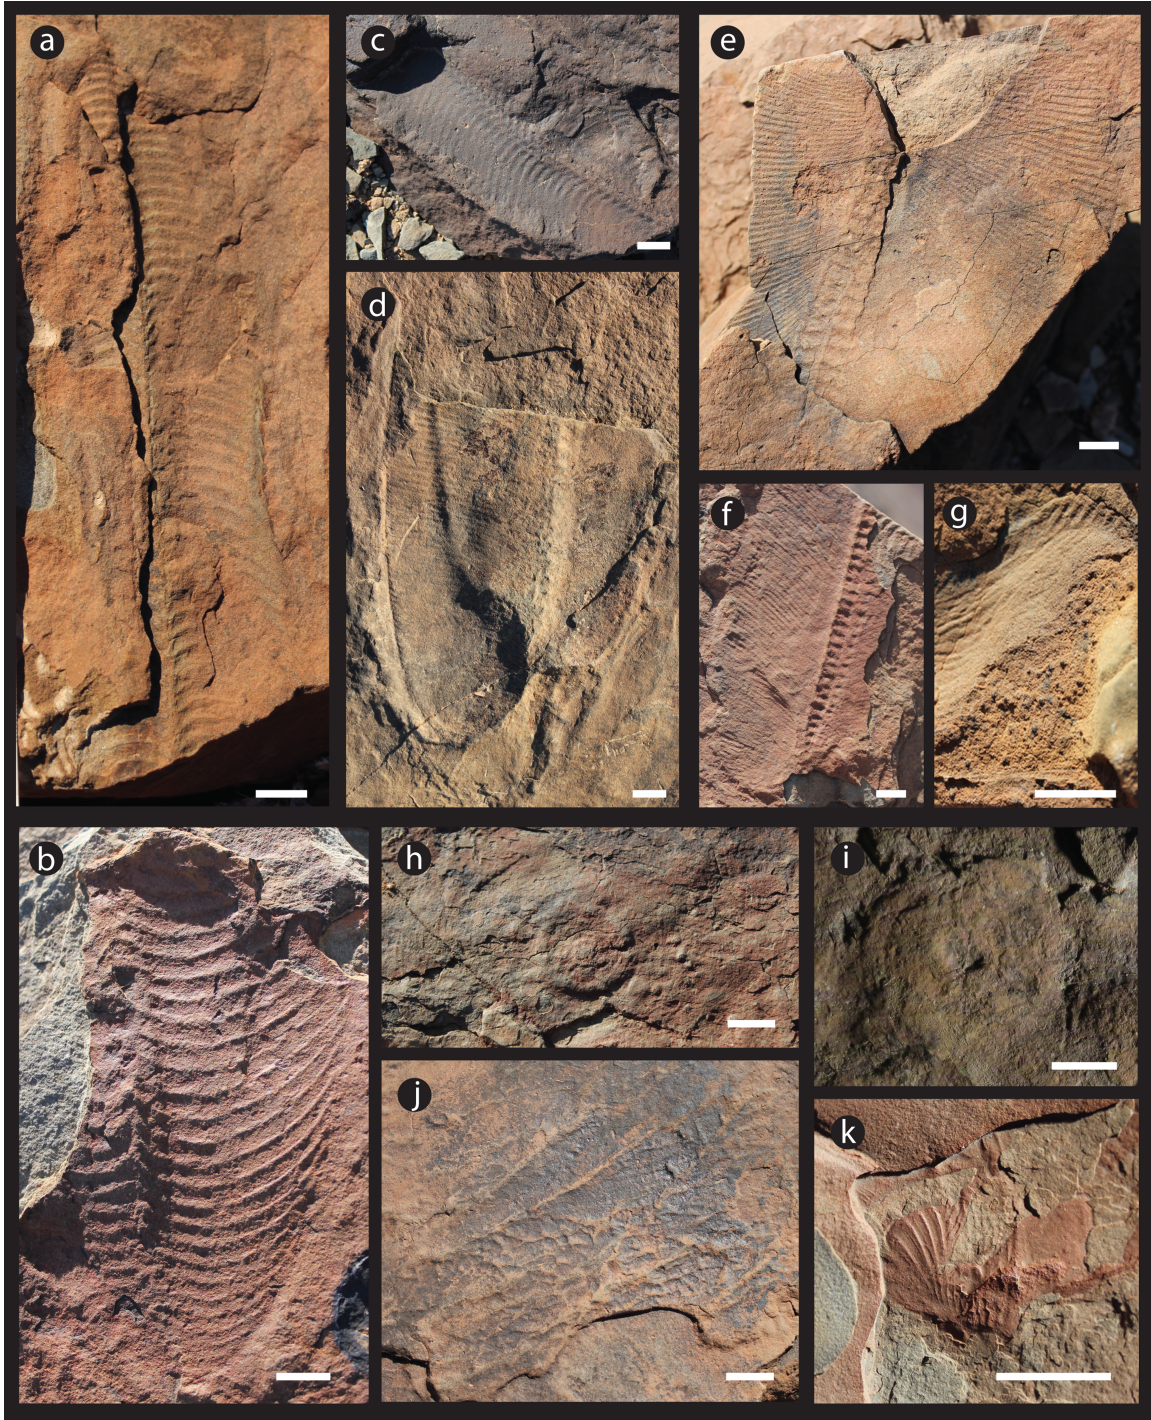

107  
108

109 **S5 (cont.)** – Collected slab preserving specimens of *Aspidella* (SWP-99); holdfast  
110 structure ('Hf'), *Swarptuntia*-type segmented stem ('St'), and *Swarptuntia*-type petaloid  
111 ('Pet') are clearly visible. The positions of multiple other suspected holdfast structures  
112 are marked with 'x'. A poorly preserved additional petaloid, possibly belonging to  
113 another *Swarptuntia*, is circled.

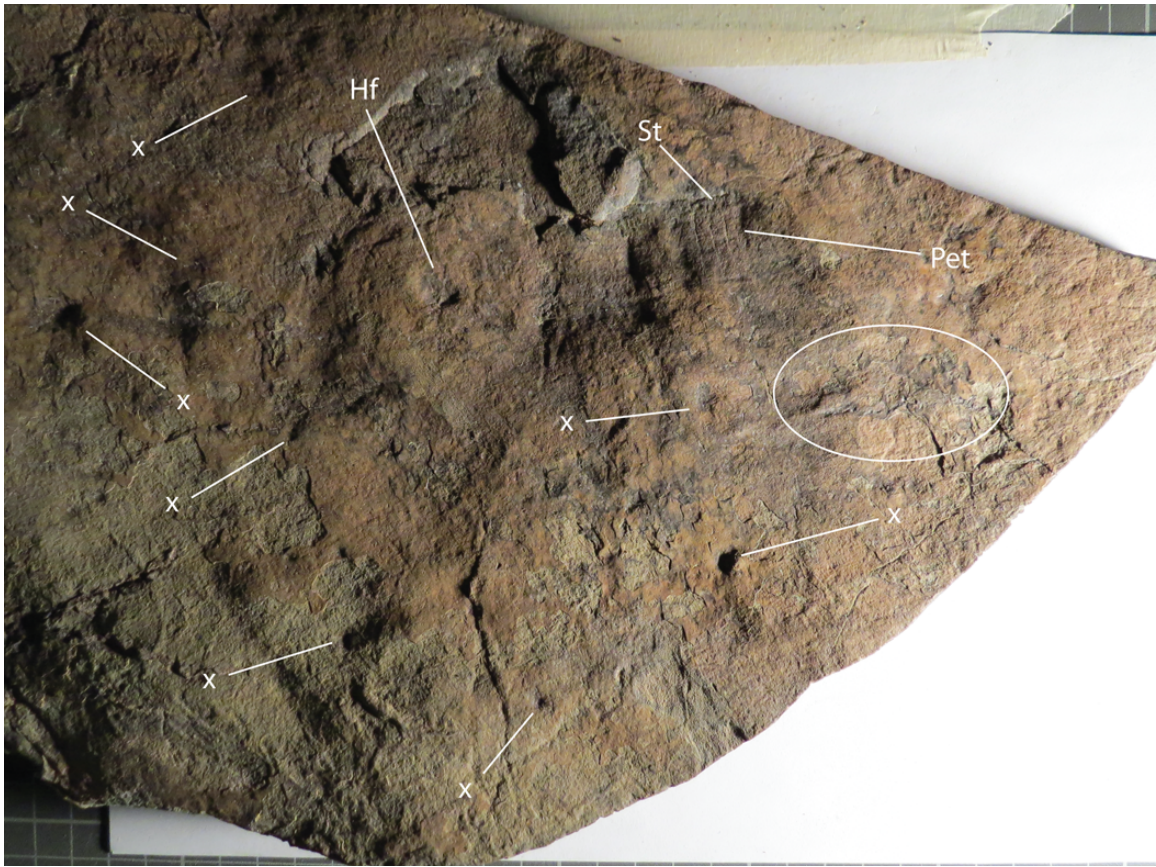

114  
115  
116  
117  
118  
119  
120  
121  
122  
123  
124

125 **S6** – Facies, taphonomic, and geochronologic summaries for analysed assemblages

126

127 Farm Swartpunt (southern Namibia)

128 *Palaeoenvironmental and stratigraphic setting* – The fossil-bearing horizons at Farm  
129 Swartpunt are part of the latest Ediacaran Nama Group, Urusis Formation (Spitskopf  
130 Member), deposited into the southernmost (Witputs) of two subbasins. Fossil beds are  
131 contained within siliciclastic horizons overlying brecciated horizons that contain slumped  
132 intervals, interpreted as a post-depositional ‘megaslump’ by Narbonne et al. (1997; see  
133 also S2). Fossils occurring above the slumped horizons are preserved in-situ (our ‘Bed 1’  
134 – see S2); within the slumped horizons fossils may have been moved from their original  
135 positions, but are most likely parautochthonous (rather than allochthonous). The  
136 palaeoenvironment is interpreted as a quiet and open-marine setting at or near fair  
137 weather wave base, and shows evidence for occasional disruption by storms (Narbonne et  
138 al., 1997).

139 *Taphonomic mode* – Fossils from all horizons are preserved as 2D casts and molds on the  
140 top- and bottom-surfaces of beds. Fossiliferous horizons frequently also preserve  
141 evidence for microbial mats, and thus were likely preserved in the “death mask” style  
142 common to many other Ediacaran localities, including Mistaken Point (Narbonne, 2005),  
143 and South Australia (Gehling, 1999). The 3D taphonomic mode, characterized by moldic  
144 infills (which can be isolated from the surrounding matrix) is not evident here, despite  
145 being frequently seen elsewhere in Namibia (see e.g., Vickers-Rich et al., 2013),  
146 reinforcing inference that these organisms represent an autochthonous accumulation.

147 *Geochronology* – An ash bed in the lower carbonate package of the Urusis Formation has  
148 been dated by U-Pb geochronology at  $545.1 \pm 1$  Ma (recalculated to  $542.58 \pm 1.25$  Ma by  
149 Schmitz, 2012), and an ash bed ~85 meters below the investigated fossil beds at  $543.3 \pm 1$   
150 Ma (Grotzinger et al., 1995 - see Fig. 1; recalculated to  $540.61 \pm 0.67$  Ma by Narbonne et  
151 al., 2012). Strata from the overlying Nomtsas Formation in the Swartkloofberg Farm  
152 directly north of Swartpunt contain an ash bed dated to  $539.4 \pm 1$  Ma (i.e., Cambrian;  
153 Grotzinger et al., 1995; recalculated to  $538.18 \pm 1.11$  Ma by Narbonne et al., 2012).

154

155 Nilpena (southern Australia)

156 *Palaeoenvironmental and stratigraphic setting* – Fossils from Nilpena occur within the  
157 Ediacara member of the Rawnsley Quartzite (Flinders Ranges), broadly consisting of a  
158 variety of shallow marine and deltaic facies, preserving evidence for wave action and  
159 occasional storms (Gehling and Droser, 2013). More detailed sedimentological studies  
160 (Droser et al., 2006; Gehling and Droser, 2013) have identified a complex series of  
161 taxon-restricted paleoecosystems representing distinct sedimentary facies (i.e.  
162 paleoenvironments) including shoreface sands, wave-base sands, delta-front sands, sheet-  
163 flow sands, and mass-flow sands. The shoreface-, wave-base-, and delta-front sands are  
164 all interpreted to reflect in-situ and untransported assemblages. By contrast, the sheet-  
165 flow- and mass-flow sands preserve (largely) transported assemblages.

166 *Taphonomic mode* – Ediacaran preservation across the Flinders Ranges is typically  
167 represented by 2D casts and molds (i.e., ‘death mask’ preservation; Gehling, 1999) on the  
168 bottom surfaces of coarse-grained sandy storm event beds. However, rare sedimentary  
169 facies from Nilpena have resulted in 3D-preservation of large Ediacaran fronds (Gehling  
170 and Droser, 2013).

171 *Geochronology* – The fossil assemblages from Nilpena are most similar to assemblages  
172 from Russia, Siberia, Ukraine, and northwestern Canada, and so assignment to the ‘White  
173 Sea’ assemblage (i.e., 555-550 Ma) is established mostly on a biostratigraphic basis. U-  
174 Pb dates from Russia indicate ages between  $552.85 \pm 0.3$  Ma (Zimnie Gory Formation) to  
175  $550.2 \pm 4.6$  Ma (base of the Yorga Formation; Iglesia-Llanos et al., 2005), however  
176 Nilpena lacks any notable volcanic ash beds, and so accurate dating has been difficult.  
177 This correlation receives some moderate support from a single U-Pb detrital zircon date  
178 of  $556 \pm 24$  Ma from the Bonney Sandstone (Preiss, 2000).

179

180 Mistaken Point (Newfoundland)

181 *Palaeoenvironmental and stratigraphic setting* – Fossiliferous horizons at Mistaken Point  
182 are dominated by relatively deepwater (> 500 m) turbiditic sandstones and mudstones  
183 (Wood et al., 2003; Ichasso et al., 2007; Mason et al., 2013; Liu et al., 2014). The fossil  
184 horizons analyzed here belong to the Drook (PC surface), Briscal (BC surface), Mistaken  
185 Point (E and D surfaces) and Trepassey (SH surfaces) Formations; for stratigraphic  
186 sections see Wood et al. (2003) and Clapham et al. (2003). Previous studies infer a  
187 deepwater (toe of slope to lower slope) paleobathymetry well below storm wave base and  
188 the photic zone (Wood et al. 2003; Ichaso et al. 2007; Mason et al., 2013). Turbidite beds  
189 are typically overlain by a thin (1–2 cm) mudstone interpreted as pelagic fallout (Wood et  
190 al. 2003). This thin pelagic mudstone is characterized by thin, black, ‘crinkly’ and  
191 discontinuous silt laminae that may represent diagenetically altered microbial mats (e.g.  
192 Wood et al. 2003; Narbonne et al. 2005). Thin (1–2 cm) beds interpreted as deepwater  
193 contourite deposits (Wood et al. 2003) are found above terminal-stage turbidite beds and,  
194 when overlain by volcanic ash, typically contain Ediacaran fossils.

195 *Taphonomic mode* – Organisms at Mistaken Point were preserved in-situ after being  
196 smothered by volcanic ash (‘Conception-style’ preservation of Narbonne 2005). The  
197 local presence of seafloor microbial mats and rapid onset of anaerobic decay led to early  
198 lithification of the soles of overlying ash beds, effectively casting fine-scale morphology  
199 (Narbonne 2005; Laflamme et al. 2011; Liu et al. 2011).

200 *Geochronology* – Ash beds bracketing the fossiliferous horizons analysed in this study  
201 have been dated using U-Pb geochronology at 580 Ma, 578 Ma, and 565 Ma (see Benus,  
202 1988; Bowring et al., 2003). See Darroch et al., 2013 (figure 1) for stratigraphic section  
203 with dated horizons in context.

204

205 White Sea (Russia)

206 *Palaeoenvironmental and stratigraphic setting* – Ediacaran deposits in the White Sea  
207 area of Russia are represented a thick (500 m) succession of sandstones, siltstones, and  
208 mudstones deposited in shallow basin at high palaeolatitudes; the studied assemblage  
209 comes from the Verkhovhka Formation, which underlies the Zimnie Gory Formation in  
210 the vicinity of the Solza River (Zakrevskaya, 2013). The analysed community comes  
211 from a single bed, and flourished in relatively shallow (at or within fair weather wave  
212 base) palaeoenvironment, likely representing an alluvial fan or delta-front type setting  
213 disrupted by periodic mass sedimentation events which buried Ediacaran organisms  
214 (Zakrevskaya, 2013).

215 *Taphonomic mode* – White Sea fossils from the analysed horizon are preserved in  
216 ‘Flinders-style’ (of Narbonne, 2005), most likely as “death masks” after being smothered  
217 by transported sediment, similar to modes of preservation described for other Ediacaran  
218 localities worldwide (Zakrevskaya, 2013). This indicates that fossils are untransported,  
219 and most likely represent an in-situ accumulation largely in life-position (Narbonne,  
220 2005; Zakrevskaya, 2013).

221 *Geochronology* – U-Pb dates from the White Sea area of Russia indicate ages between  
222  $552.85 \pm 0.3$  Ma (Zimnie Gory Formation) to  $550.2 \pm 4.6$  Ma (base of the Yorga  
223 Formation; Llanos et al., 2005). The base of the Verkhovhka Formation has a U-Pb date  
224 of  $558 \pm 1$  Ma (Grazhdankin, 2004).

225

226

227

228

229

230

231

232

233

234

235

236

237

238

239 **S7** – Palaeoecological indices for all studied (raw) datasets; ‘SR’ = Species Richness,  
 240 ‘Dom.’ = Dominance (1 – Simpson’s Index), ‘M-Div’ = Margalef’s Diversity, ‘S-W’ =  
 241 Shannon-Weiner Index, ‘B&G Even.’ = Buzas and Gibson’s Evenness. Note that no  
 242 surveyed-area estimates have been published for Nilpena datasets (Gehling and Droser,  
 243 2013), raising the possibility (however unlikely) that some of the elevated diversity seen  
 244 in these sites may be due to richness-area effects. Also note that given the incomplete  
 245 outcrop and geometry of our ‘Bed 1’ at Swartpunt, no reliable estimates of surveyed area  
 246 could be obtained. For Mistaken Point datasets, ‘*Charnia*’ on the Mistaken Point BC, D,  
 247 E, and SH surfaces is now assigned to *Beothukis* (Brasier and Antcliffe, 2009). ‘Networks’  
 248 on the D surface are now assigned to *Hapsidophyllas* (Bamforth and Narbonne, 2009).  
 249 ‘*Charnia I*’ on the LMP surface is now assigned to *Trepassia* (Narbonne and Gehling,  
 250 2003), while ‘*Charnia II*’ and ‘ostrich feathers’ on the same surface are both assigned to  
 251 *Culmofrons* (Laflamme et al., 2012). *Hiemalora* on the LMP surface is now assigned to  
 252 *Primocandelabrum*, on the basis of observations by Hoffmann et al. (2008). Similar to  
 253 Darroch et al. (2013) we exclude Ivesheadiomorphs from analyses, as these may not  
 254 represent body fossils (see for example Liu et al., 2012). For Nilpena datasets, numbers  
 255 of *Aspidella* and *Funisia* are listed as ‘>999’ in some facies. In these cases we have  
 256 standardized the number of these taxa at 1000 individuals. All indices were calculated  
 257 using the open-access statistical software R.

| Dataset            | n    | Area (m <sup>2</sup> ) | SR | Dom. | M-Div. | S-W  | B&G Even. | Ref. |
|--------------------|------|------------------------|----|------|--------|------|-----------|------|
| Farm_Swartpunt     | 79   | 20358.68               | 5  | 0.52 | 0.92   | 0.90 | 0.49      | NA   |
| Swartpunt_Bed1     | 28   | NA                     | 3  | 0.54 | 0.60   | 0.74 | 0.7       | NA   |
| MP_E_surface       | 3020 | 104.75                 | 6  | 0.34 | 0.62   | 1.29 | 0.61      | [31] |
| MP_BC_surface      | 103  | 0.71                   | 4  | 0.59 | 0.65   | 0.74 | 0.52      | [31] |
| MP_D_surface       | 1455 | 63.4                   | 7  | 0.66 | 0.82   | 0.70 | 0.29      | [31] |
| MP_G_surface       | 135  | 7.05                   | 5  | 0.39 | 0.82   | 1.12 | 0.61      | [31] |
| MP_LMP_surface     | 300  | 14.0                   | 8  | 0.38 | 1.23   | 1.22 | 0.42      | [31] |
| MP_PC_surface      | 158  | 16.7                   | 2  | 0.80 | 0.20   | 0.35 | 0.71      | [31] |
| MP_SH_surface (NE) | 159  | NA                     | 4  | 0.90 | 0.59   | 0.24 | 0.32      | [31] |
| MP_SH_surface (SW) | 160  | NA                     | 4  | 0.92 | 0.59   | 0.22 | 0.31      | [31] |
| Nilpena_shoreface  | 11   | NA                     | 5  | 0.22 | 1.67   | 1.55 | 0.94      | [32] |
| Nilpena_wavebase   | 3069 | NA                     | 15 | 0.23 | 1.74   | 1.79 | 0.40      | [32] |
| Nilpena_deltafront | 554  | NA                     | 19 | 0.25 | 2.85   | 1.88 | 0.34      | [32] |
| Nilpena_sheetflow  | 1455 | NA                     | 14 | 0.49 | 1.79   | 1.21 | 0.24      | [32] |
| Nilpena_massflow   | 59   | NA                     | 7  | 0.19 | 1.47   | 1.75 | 0.82      | [32] |
| MP_combined        | 4610 | 175.2                  | 10 | 0.79 | 1.41   | 1.3  | 0.38      | NA   |
| White Sea (Solza)  | 390  | 14.4                   | 12 | 0.19 | 1.84   | 1.9  | 0.56      | XXX  |

258

259

260

261

262

263

264 **S8** – Results of rarefaction analyses at species (rather than genus) level; note that patterns  
 265 are virtually identical between analyses at both taxonomic resolutions.

### Species

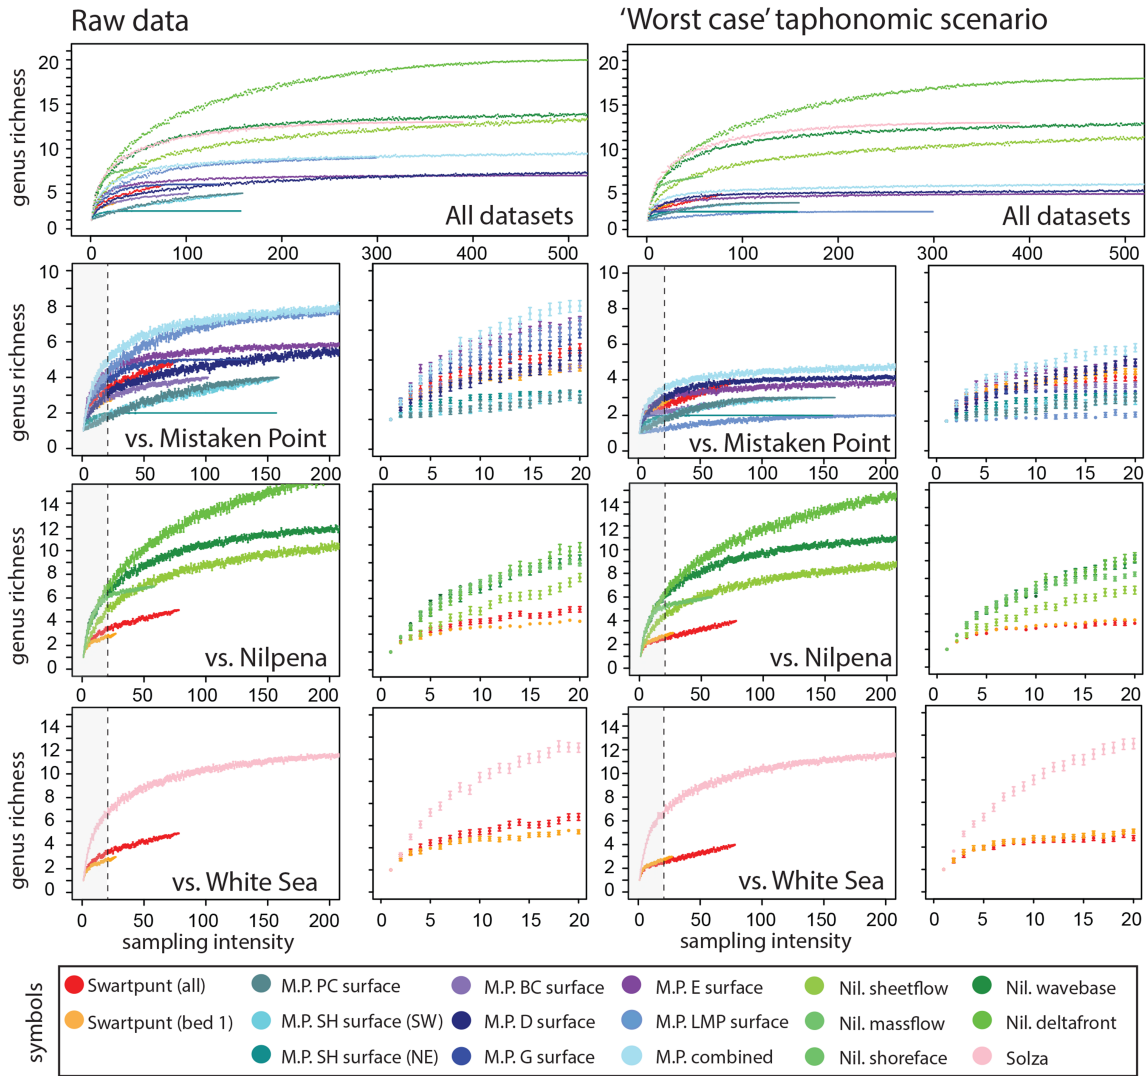

266  
 267  
 268  
 269  
 270  
 271  
 272  
 273

274 **S9** – Results of rarefaction analyses excluding *Aspidella* for both genus- and species-level  
 275 analyses; results are identical to those of raw data, illustrating that patterns are not  
 276 controlled by frondose taxa. Top panels illustrate all datasets. Middle panels illustrate  
 277 contrasts between Swartpunt and Mistaken Point datasets, and lower panels illustrate  
 278 contrasts between Swartpunt and Nilpena datasets; error bars have been added to these  
 279 panels as 95% confidence intervals around mean diversity values. Areas of low sampling  
 280 intensity (shaded in grey) have been expanded in adjacent panels to better illustrate  
 281 differences in richness at low sample numbers.

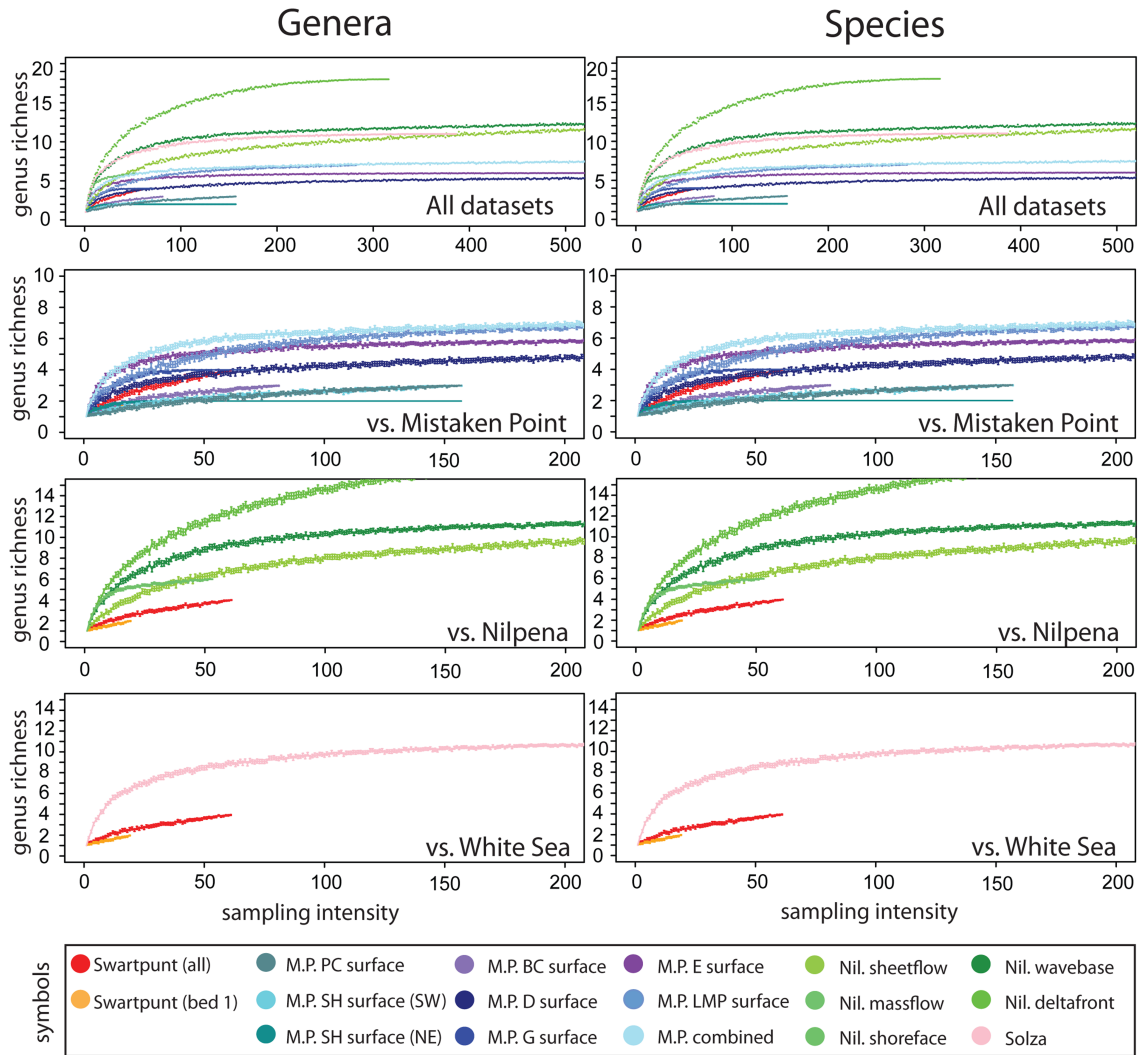

282

283

284

285

286

287



288 **S10** – Supp. Geochemical data Table 1 (as .xls file)

289

290 **S11** – Supp. Geochemical data Table 2 (as .xls file)

291

292 **S12** – Although these geochemical tests provide no evidence for a stressed environment,  
293 caveats do exist. First, current geochemical proxies can fingerprint anoxic conditions  
294 with certainty, but have difficulty unambiguously distinguishing oxic from ferruginous  
295 conditions under certain conditions (Sperling et al., 2014). The sum of multi-proxy data  
296 from the Spitskopf Member, however, makes a ferruginous Palaeoenvironment unlikely.  
297 More pertinently, available geochemical proxies distinguish oxic from anoxic conditions  
298 in an essentially binary fashion, and cannot inform us about degrees of dysoxia that are  
299 biologically relevant (Poulton and Canfield, 2011). Along these lines, it is also possible  
300 that the Nama Group Ediacarans were living in close proximity to a chemocline, and  
301 were periodically flooded by low-O<sub>2</sub> waters. The biological relevance of this is mitigated  
302 by the observation that in modern environments where metazoans are subjected to  
303 periodic upwelling of anoxic and even euxinic waters, such as off the coast of Namibia, a  
304 well-established and moderate diversity (albeit lower diversity than in very nearshore  
305 waters) community continues to exist (Zettler et al., 2009; 2013). This illustrates that in  
306 the modern ocean, relatively diverse communities of aerobic multicellular heterotrophs  
307 can exist in the face of periodic dysoxic to anoxic waters (although many Ediacaran  
308 organisms may not actually have been animals – see Erwin et al., 2011; Laflamme et al.,  
309 2013). Finally, it is noted that organic carbon contents of the fossiliferous strata are not  
310 just low, but essentially nonexistent. In conjunction with a complete absence of pyrite, it  
311 suggests that these rocks have been subject to oxidative weathering processes. While this  
312 will not unduly affect the ability of the iron speciation proxy to distinguish an oxic from  
313 anoxic water column, as pyrite will weather into iron oxides and remain in the highly  
314 reactive pool, it does indicate that the original organic carbon values were likely higher  
315 than measured.

316

### 317 **Supplementary references**

318 56] Brasier, M.D., Antcliffe, J.B., 2009. Evolutionary relationships within the Avalonian  
319 Ediacara biota: new insights from laser analysis. *Journal of the Geological Society of*  
320 *London* 166, 363–384.

321 57] Bamforth, E.L., Narbonne, G.M., 2009. New Ediacaran rangeomorphs from Mistaken  
322 Point, Newfoundland, Canada. *Journal of Palaeontology* 83, 897–913.

323 58] Narbonne, G.M., Gehling, J.G., 2003. Life after snowball: the oldest complex  
324 Ediacaran fossils. *Geology* 31, 27–30.

325 59] Laflamme, M., Flude, L.I., Narbonne, G.M., 2012. Ecological tiering and the  
326 evolution of a stem: the oldest stemmed frond from the Ediacaran of Newfoundland,  
327 Canada. *Journal of Palaeontology* 86, 193–200.

- 328 60] Hoffmann, H.J., O'Brien, S.J., King, A.F., 2008. Ediacaran biota on Bonavista  
329 Peninsula, Newfoundland, Canada. *Journal of Palaeontology* 82, 1–36
- 330 61] Gehling, J.G. 1999. Microbial Mats in Terminal Proterozoic Siliciclastics: Ediacaran  
331 Death Masks. *Palaios* 14, 40-57.
- 332 62] Iglesia-Llanos, M.P., Tait, J.A., Popov, V., Abalmasova, A. 2005. Palaeomagnetic data  
333 from the Ediacaran (Vendian) sediments of the Arkhangelsk region, NW Russia: an  
334 alternative apparent polar wander path of Baltica for the Late Proterozoic-Early  
335 Palaeozoic. *Earth and Planetary Science Letters* 240, 732-747.
- 336 63] Preiss, W.V. 2000. The Adelaide Geosyncline of South Australia and its significance  
337 in Neoproterozoic continental reconstruction. *Precambrian Research* 100, 21-63.
- 338 64] Ichaso, A.A., Dalrymple, R.W., Narbonne, G.M. 2007. Paleoenvironmental and basin  
339 analysis of the late Neoproterozoic (Ediacaran) upper Conception and St. John's groups,  
340 west Conception Bay, Newfoundland. *Canadian Journal of Earth Sciences* 44, 25–41.
- 341 65] Mason, S.J., Narbonne, G.M., Dalrymple, R.W., O'Brien, S.J. 2013.  
342 Paleoenvironmental analysis of Ediacaran strata in the Catalina Dome, Bonavista  
343 Peninsula, Newfoundland. *Canadian Journal of Earth Sciences* 50, 197-212.
- 344 66] Laflamme, M., Schiffbauer, J.D., Narbonne, G.M., Briggs, D.E.G. 2011. Microbial  
345 biofilms and the preservation of the Ediacara biota. *Lethaia* 44, 203-213.
- 346 67] Liu, A.G., McIlroy, D., Antcliffe, J.B., Brasier, M.D. 2011. Effaced preservation in  
347 the Ediacara biota and its implications for the early macrofossil record. *Palaeontology* 54,  
348 607-630.
- 349 68] Benus, A.P. 1988. Sedimentological context of a deep-water Ediacaran fauna  
350 (Mistaken Point, Avalon Zone, eastern Newfoundland). *In* Landing, E., Narbonne, G.M.,  
351 Myrow, P. (eds.) Trace fossils, small shelly fossils and the Precambrian–Cambrian  
352 Boundary. *New York State Museum and Geological Survey Bulletin* 463, 8–9.
- 353 69] Grazhdankin, D. 2004. Patterns of distribution in the Ediacaran biotas: facies versus  
354 biogeography and evolution. *Paleobiology* 30, 203–221.
- 355 70] Sperling, E.A., Rooney, A.D., Hays, L., Sergeev, V.N., Vorob'eva, N.G., Sergeeva,  
356 N.D., Selby, D., Johnston, D.T., Knoll, A.H., 2014. Redox heterogeneity of subsurface  
357 waters in the Mesoproterozoic ocean. *Geobiology* 12, 373-386.
- 358 71] Zettler, M.L., Bochert, R., Pollehne, F., 2009. Macrozoobenthos diversity in an  
359 oxygen minimum zone off northern Namibia. *Marine Biology* 156, 1949-1961.
- 360 72] Zettler, M.L., Bochert, R., Pollehne, F., 2013. Macrozoobenthic biodiversity patterns  
361 in the northern province of the Benguela upwelling system. *African Journal of Marine  
362 Science* 35, 283-290.
